# Supplementary material for: Novel genetic features of human and mouse Purkinje cell differentiation defined by comparative transcriptomics
Source: bioRxiv or medRxiv preprint supplement (doi:10.1101/2020.01.07.897371), 2020-01-08
Supplement: Supplementary file [file media-1.pdf]

## Supplemental Figures

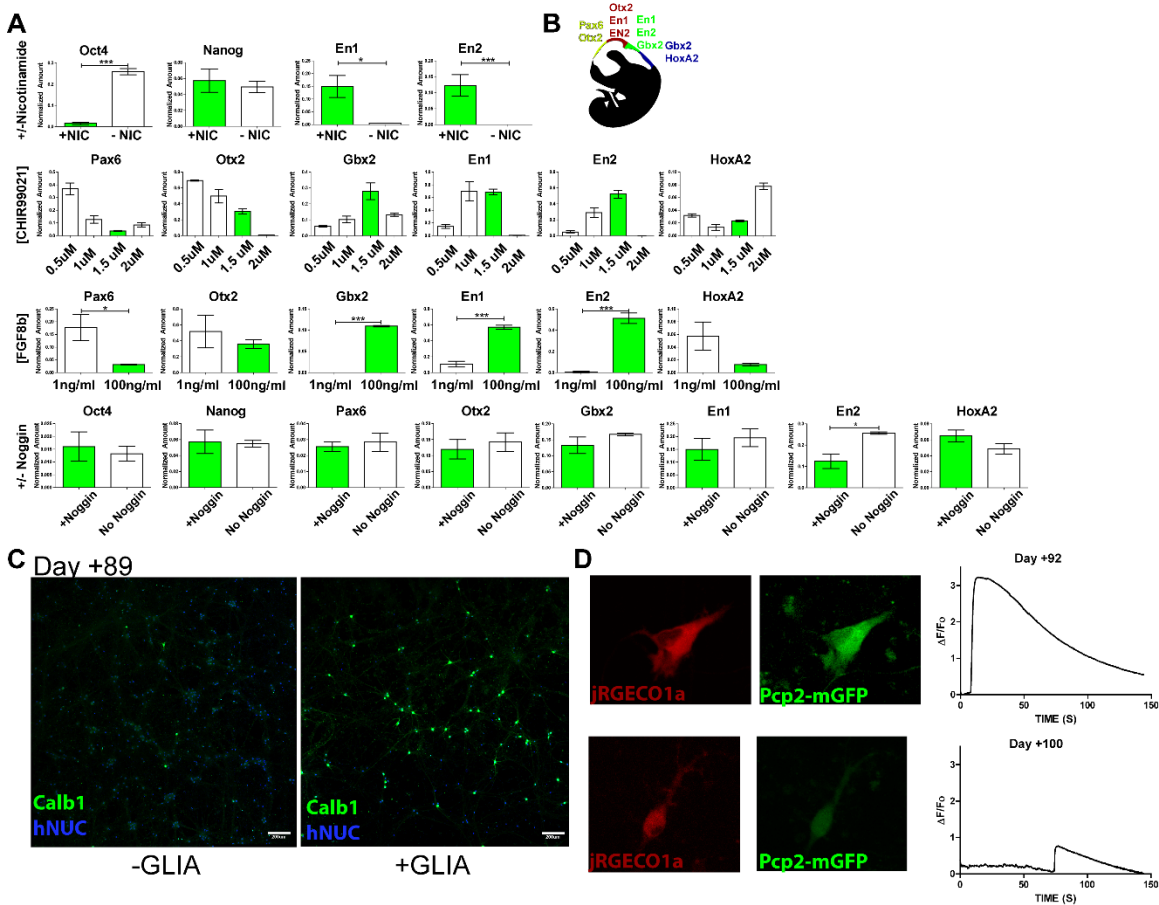

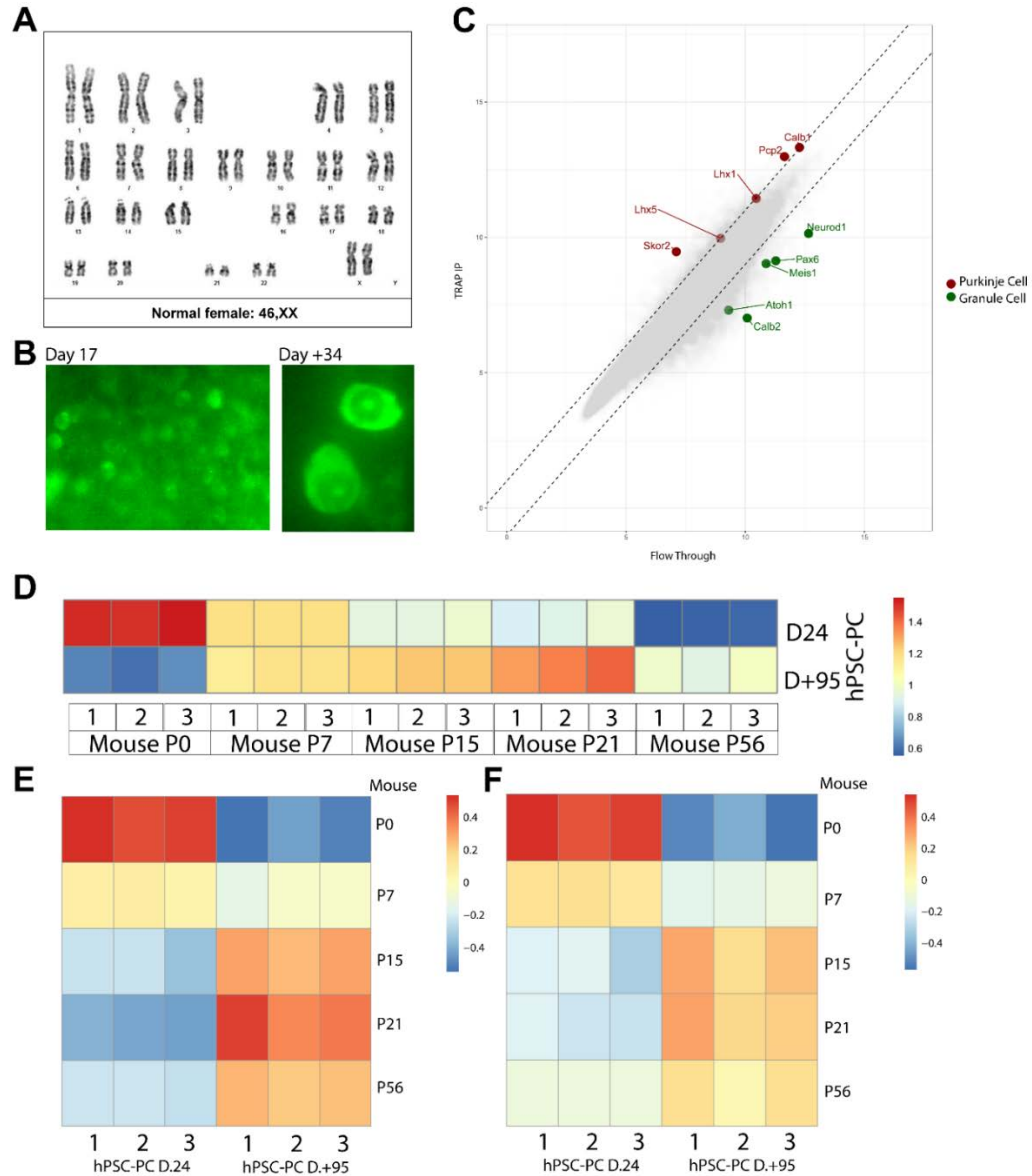

**Supplemental Figure 2. Translational Profiling in hPSC-PCs and Mouse PCs.** **A.** Karyotype analysis of RUES2-PCP2-L10a-EGFP stem cell line. **B.** Live imaging of the L10a-EGFP TRAP reporter after 17 days of differentiation and an additional +34 days of differentiation following isolation and co-culture. **C.** Test for enrichment of PC markers and depletion of GC markers from TRAP isolation of RNA from a P7 *Tg(Pcp2-L10a-Egfp)* TRAP mouse, dotted lines represent Log<sub>2</sub> fold change. **D.** Heat map depicting expression levels in mouse PCs over postnatal development of gene sets defined as log<sub>2</sub> four-fold change between Day 24 and Day +95 in hPSC-PCs following subtraction of mouse genes from hPSC-PC data using an in silico human-mouse reference genome (34). Day 24 hPSC-PCs are most similar to P0 mouse PCs ( $p=5.26 \times 10^{-17}$ ). Day +95 PCs are most similar to P21 mouse PCs ( $p=3.73 \times 10^{-5}$ ). **E.** Heat map depicting expression levels in hPSC-PCs of mouse gene sets defined as the 100 most expressed genes per time point. **F.** Heat map depicting expression level in hPSC-PCs of mouse gene sets defined as the 100 most expressed genes per time point following subtraction of mouse genes from hPSC-PC data using an in silico human-mouse reference genome (34).

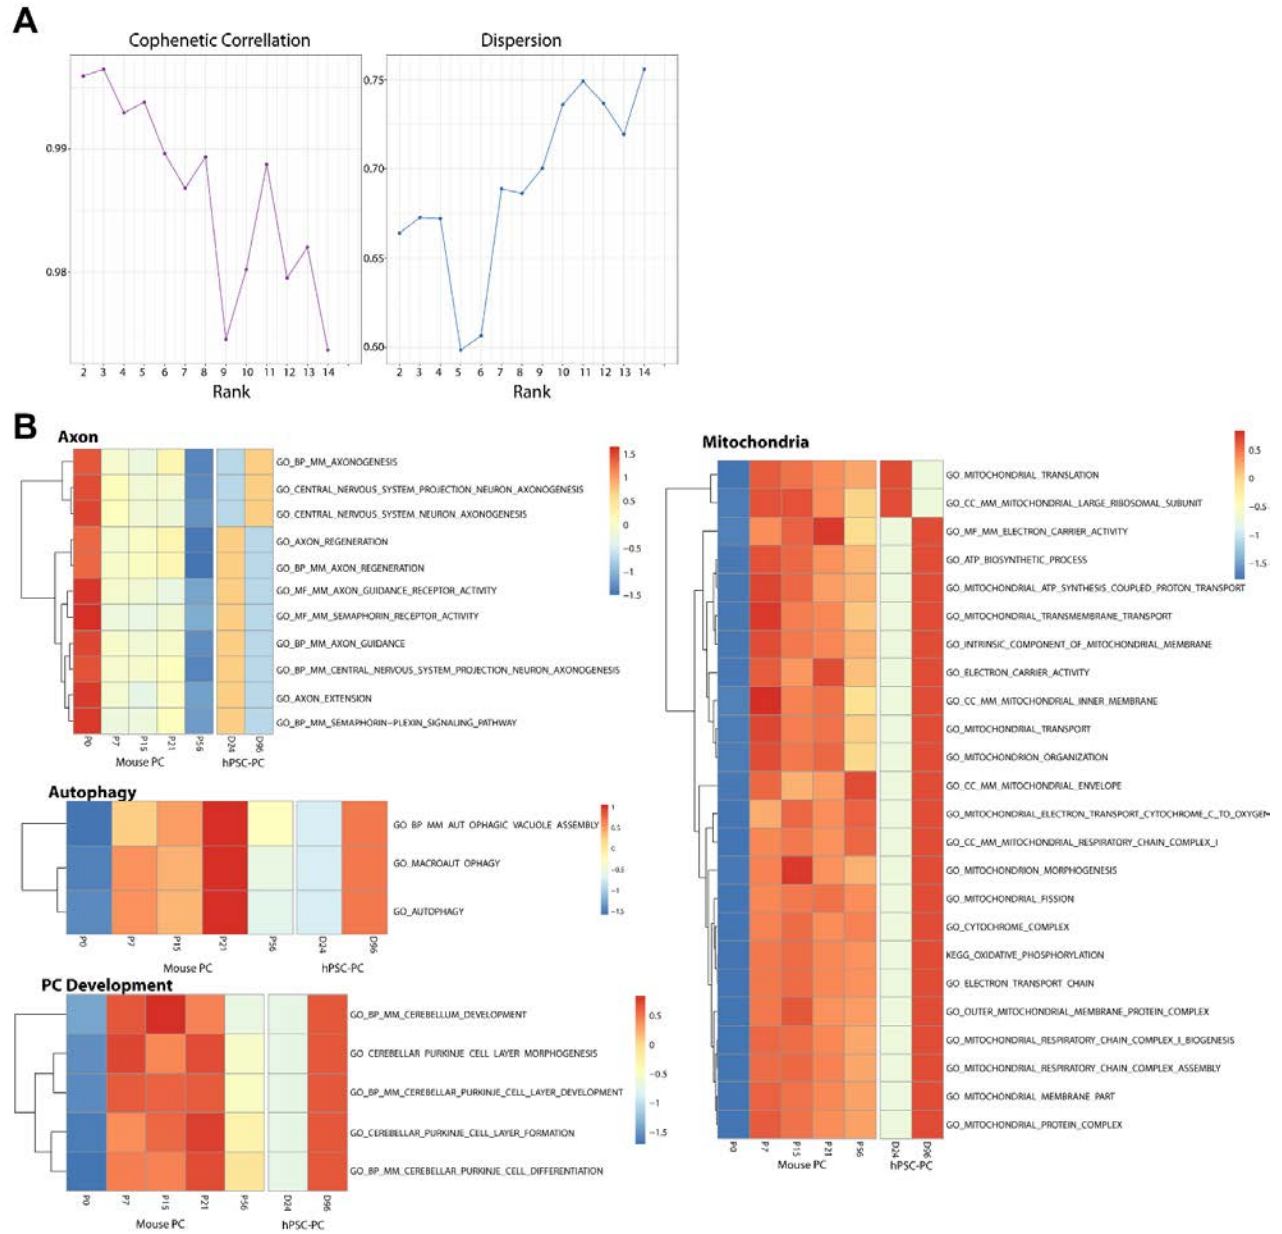

**Supplemental Figure 3. NMF metagene analysis of mouse PC TRAP Data. A.** Cophenetic correlation and dispersion by rank (metagene number). Rank 5 showed high cophenetic correlation with low dispersion. **B.** Heat maps depicting all gene ontology terms for the gene ontology signatures (Axon, Autophagy, PC Development, Mitochondria) in Figure 3.

**A - Mouse PC Development**

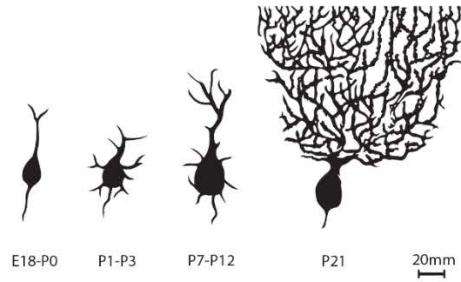

**B - Human PC Development**

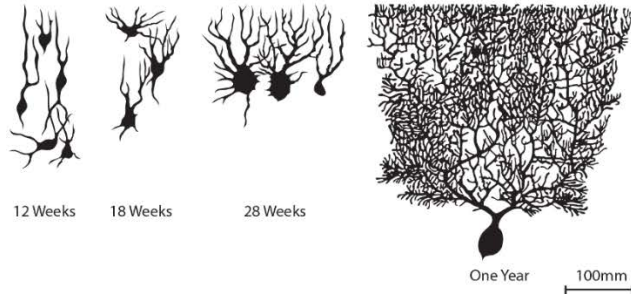

**C**

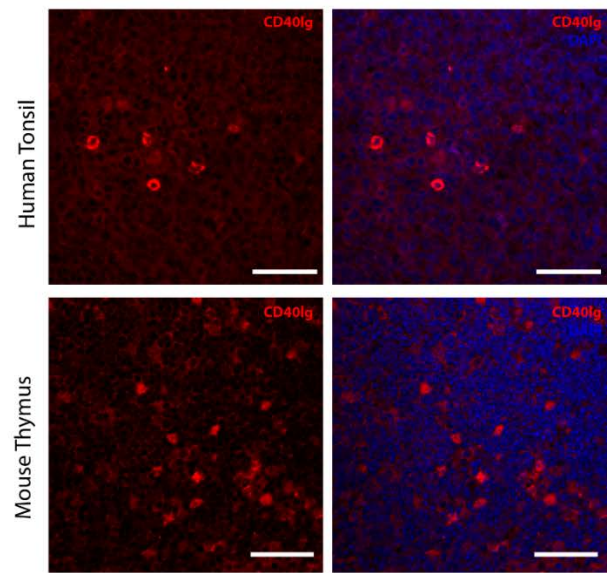

**Supplemental Figure 4. Species differences.** **A.** Schematic of mouse PC development. (Adapted from (76) and (77)). **B.** Schematic of human PC development (Adapted from (27)). **C.** Positive controls for anti-human CD40LG antibody and anti-mouse CD40LG antibody. Scale bars = 50µm.

| Gene  | Forward                     | Reverse                      | Source                          |
|-------|-----------------------------|------------------------------|---------------------------------|
| Oct4  | CAGTGCCCGAAACCCACAC         | GGAGACCCAGCAGCCTCAA          | (78)                            |
| Nanog | CAGAAGGCCTCAGCACCTA<br>C    | ATTGTTCCAGGTCTGGTTGC         | (78)                            |
| Pax6  | TCACCATGGCAAATAACCTG        | CAGCATGCAGGAGTATGAGG         | Designed on<br>Primer3          |
| Otx2  | ACAAGTGGCCAATTCCTCC         | GAGGTGGACAAGGGATCTGA         | Designed on<br>Primer3          |
| Gbx2  | GTTCCCGCCGTCGCTGATG<br>AT   | GCCGGTGTAGACGAAATGGCC<br>G   | Designed on<br>Primer3          |
| En1   | GAGCGCAGGGCACCAAATA         | CGAGTCAGTTTTGACCACGG         | Primerbank<br>(126090908c<br>1) |
| En2   | GGCGTGGGTCTACTGTACG         | TACCTGTTGGTCTGGAACCTCG       | Designed on<br>Primer3          |
| HoxA2 | CGTCGCTCGCTGAGTGCCT<br>G    | TGTCGAGTGTGAAAGCGTCGA<br>GG  | (24)                            |
| GPI3' | GGACCACGAGCCCTTAGC          | AACACTTCAGCCAATTCTAACA<br>C  | (65)                            |
| GPI5' | CGTCATCAACATTGGCATTG<br>G   | GGGACCTCCTGAAGAGTATGG        | (65)                            |
| HMBS  | TGCTATCTGGGGAGTGATTA<br>CC  | GGCTGTTGCTTGACTTCTC          | (65)                            |
| GAPD  | AGCAAGAGCACAAAGAGGAA<br>GAG | GAGCACAGGGTACTTTATTGAT<br>GG | (65)                            |

**Supplementary Table 1. qPCR Primer Sequences.**

| <b>Antibody</b> | <b>% Triton X-100</b>              | <b>Dilution</b> | <b>Source</b>                                          |
|-----------------|------------------------------------|-----------------|--------------------------------------------------------|
| En1             | 0.3                                | 1:10,000        | Gift of T. Jessell                                     |
| Otx2            | 0.3                                | 1:2000          | Millipore Cat# AB9566,<br>RRID:AB_2157186              |
| Kirrel2         | 0.3                                | 1:250           | R&D Systems                                            |
| Corl2(Skor2)    | 0.3                                | 1:200           | Atlas Antibodies Cat#<br>HPA046206,<br>RRID:AB_2679588 |
| Pcp2(L7)        | 0-0.1                              | 1:500           | Takara Cat#M202                                        |
| Calb1           | 0.3                                | 1:250           | Swant Cat# 300,<br>RRID:AB_10000347                    |
| Calb1           | 0.3                                | 1:500           | Swant Cat# CB38,<br>RRID:AB_2721225                    |
| GD3             | 0                                  | 1:200           | BioLegend Cat# 917701,<br>RRID:AB_2565200              |
| NCAM(CD56)      | 0                                  | 1:200           | BioLegend Cat# 304601,<br>RRID:AB_314443               |
| hNUC            | 0.3                                | 1:200           | Millipore Cat# MAB1281,<br>RRID:AB_94090               |
| Syn1            | 0.3                                | 1:500           | Sigma-Aldrich Cat#<br>S193, RRID:AB_261457             |
| GFP             | 0.3                                | 1:4000          | Aves Labs Cat# GFP-<br>1020,<br>RRID:AB_10000240       |
| Human CD40lg    | 0.05 cell culture,<br>0.1 paraffin | 1:50            | R and D Systems Cat#<br>MAB617,<br>RRID:AB_2291414     |
| Mouse CD40lg    | 0.05                               | 1:50            | R and D Systems Cat#<br>AF1163,<br>RRID:AB_35463       |

**Supplemental Table 2. Antibody List.**
